# Supplementary material for: Prevalence of HIV and hepatitis B virus among pregnant women in Luanda (Angola): geospatial distribution and its association with socio-demographic and clinical-obstetric determinants
Source: Springer Nature journal article supplement (doi:10.1186/s12985-021-01698-7), 2021-12-01
Supplement: MOESM1 [file 19932600]

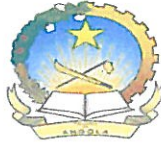

REPÚBLICA DE ANGOLA  
MINISTÉRIO DA SAÚDE

COMITÉ DE ÉTICA

Nº 30 2019

Sobre o protocolo de investigação intitulado «**Prevalência, Caracterização Serológica e Molecular da Toxoplasmose em Mulheres Gravidas: Incidência da Toxoplasmose Congénita em Algumas Maternidades de Luanda**», submetido a este Comité pela **Senhora Amelia João Alice Nkutxi Vueba**, Estudante de Doutoramento em Ciências Farmacêuticas/Especialização Microbiologia e Parasitologia da Faculdade de Farmácia da Universidade de Coimbra/Portugal.

A leitura e análise do protocolo em epígrafe, permitiu ao Comité constatar a pretensão em contribuir na actualização do conhecimento e informações referentes a esta doença.

O projecto enquadra-se na iniciativa e estratégia do Ministério da Saúde na melhoria da qualidade dos serviços prestados à população e até nas acções de prevenção e promoção da saúde dos angolanos. O Comité considera o protocolo do estudo «**Positivo**», porque a sua investigação irá definir e implementar programas de prevenção primária nas grávidas, uma vez que é fundamental e importante para a prevenção da toxoplasmose congénita.

FEITO EM LUANDA, AOS 23 DE SETEMBRO DE 2019.

A COORDENADORA DO CE  
  
DRA. JOANA FILIPA M. M. AFONSO
