# Supplementary material for: Prevalence of HIV and hepatitis B virus among pregnant women in Luanda (Angola): geospatial distribution and its association with socio-demographic and clinical-obstetric determinants
Source: Springer Nature journal article supplement (doi:10.1186/s12985-021-01698-7), 2021-12-01
Supplement: MOESM3 [file 19932600]

### **S3 File - Programs and datasets used to create the maps**

The maps were produced using ArcMap 10.x.

Vectorial (i) points representing the mothers and the hospital was collected by the authors with GPS; ii) polygons representing the administrative regions were collected by the authors at the Angola National Statistics) and raster (heat maps were produced by the authors, based on the point collected with GPS) data was used.

The basemap, or background map are provided by ESRI and its credits are presented in each one of the maps (as the owners of the basemap define it). The text presented is:

**Fig 1)** Service Layer Credits: Sources: Esri, HERE, DeLorme, TomTom, Intermap, increment P Corp., GEBCO, USGS, FAO, NPS, NRCAN, GeoBase, IGN, Kadaster NL, Ordnance Survey, Esri Japan, METI, Esri China (Hong Kong), swisstopo, MapmyIndia, © OpenStreetMap contributors, and the GIS User Community Sources: Esri, DeLorme, USGS, NPS Sources: Esri, USGS, NOAA

**Fig 3)** Service Layer Credits: Sources: Esri, HERE, DeLorme, TomTom, Intermap, increment P Corp., GEBCO, USGS, FAO, NPS, NRCAN, GeoBase, IGN, Kadaster NL, Ordnance Survey, Esri Japan, METI, Esri China (Hong Kong), swisstopo, MapmyIndia, © OpenStreetMap contributors, and the GIS User Community
