# Supplementary material for: Prevalence of HIV and hepatitis B virus among pregnant women in Luanda (Angola): geospatial distribution and its association with socio-demographic and clinical-obstetric determinants
Source: Virol J. 2021 Dec 4;18:239. doi: 10.1186/s12985-021-01698-7 (PMC8642931; doi:10.1186/s12985-021-01698-7)
Supplement: Supplementary file 2 — Additional file 2. File S2. Recruitment Questionnaire/Questionário de Recrutamento. [file 12985_2021_1698_MOESM2_ESM.pdf]

## QUESTIONNAIRE

Date \_\_\_\_/\_\_\_\_/\_\_\_\_

Internal Number: \_\_\_\_\_

Laboratory: \_\_\_\_\_

Process number: \_\_\_\_\_

### ***Personal data***

Residence: \_\_\_\_\_

Level of education: \_\_\_\_\_

Age: \_\_\_\_\_ Gestational Age: \_\_\_\_\_

Number of births

0 ☐

1 and 2 ☐

≥3 ☐

Did you do prenatal consultation in all pregnancies?

No ☐

Yes ☐

### **Risk factors**

**1. Have you ever done a HIV and Hepatitis B virus (HBV) test?**

No ☐

Yes ☐

**2. Awareness of HIV and Hepatitis B:**

Do not you know anything about the diseases ☐

It has hear spoken, but does not know anything about it ☐

know anything about the diseases ☐

**3. In the residence, do you have a basic sanitation? (water treated, collection refuse, sewage system):**

Yes ☐

No ☐ If not, which one do not have?

Water treated ☐

Collection refuse ☐

Sewage system ☐

**4. Do you currently have pets at home?**

No ☐

Yes ☐ If so, which? Cats ☐

Dogs ☐

Others ☐

**5. Currently has contact with animals other than yours at home the of relatives or other households.?**

No ☐

Yes ☐ If so, which?

Cats ☐

Dogs ☐

Others ☐

**6. Do you have contact with cats other than yours?**

No ☐

Yes ☐ If so, how often?

Very frequent ☐

Less frequent ☐

Rarely ☐

**7. In the case you have pet cats, where do they defecate?**

Inside home ☐

In the vicinity of the house ☐

Far from the house ☐

**8. If you have pet cats, what is your main food?**

Ration ☐

Leftover food (cooked) ☐

Restos de carne crua ☐

**9. Do you know of rodents at or near your home?**

No ☐

Yes ☐

**10. Do you have a garden in your residence?**

No ☐

Yes ☐ In the case of yes this is fenced, preventing the entry of cats

No ☐

Yes ☐

**11. Do you carry out soil-related activities (gardening, agriculture, etc.)?**

No ☐

Yes ☐

**12. Do you have farmed animals for your own consumption?**

No ☐

Yes ☐ if yes, which one

Cattle ☐

Pigs ☐

Birds ☐

Others ☐

**12. Do you have habits of consuming meat from animals slaughtered in hunting such as birds, rabbits, wild boars etc.**

No ☐

Yes ☐

**13. Do you eat raw or undercooked meat?**

No ☐

Yes ☐ if yes, from which animals?

Cattle ☐

Pigs ☐

Birds ☐

☐

Others

if yes, how often?

Very common ☐

Less common ☐

Rarely ☐

**14. Do you consume unpasteurized milk or dairy products?**

No ☐

Yes ☐

if yes, how often?

Very common ☐

Less common ☐

Rarely ☐

**15. Do you always wash fruits and vegetables before consuming them?**

No ☐

Yes ☐

if yes, how often?

Very common ☐

Less common ☐

Rarely ☐

**16. Do you eat raw or undercooked eggs?**

No ☐

Yes ☐

if yes, how often?

Very common ☐

Less common ☐

Rarely ☐

**17. Do you consume water from well / borehole?**

No ☐

Yes ☐

if yes, how often?

Very common ☐

Less common ☐

Rarely ☐

**18. Have you recently had a blood transfusion?**

No ☐

Yes ☐

**19. Recently had you a needle stick / syringe accident?**

No ☐

Yes ☐

## Questionário de Recrutamento

Data \_\_\_\_/\_\_\_\_/\_\_\_\_

Número interno: \_\_\_\_\_

Laboratório: \_\_\_\_\_

Número do Processo: \_\_\_\_\_

### *Dados Pessoais*

Residência: \_\_\_\_\_

Nível de escolaridade: \_\_\_\_\_

Idade: \_\_\_\_\_ Idade Gestacional: \_\_\_\_\_

Quantas vezes já esteve grávida?

Uma ☐

Duas ☐

Mais ☐

Fez consulta pre - natal em todas as gestações?

Não ☐

Sim ☐

### Factores de risco

#### **1. Alguma vez fez o teste HIV e ao vírus da Hepatite B (HBV)?**

Não ☐

Sim ☐

#### **2. Conhecimento sobre HIV e Hepatite B:**

Desconhece ☐

Já ouviu falar, mas não sabe nada a respeito ☐

Sabe alguma coisa sobre a doença ☐

**3. Na residência, possui saneamento básico? (água tratada, colheita de lixo, sistema de esgoto):**

Sim ☐

Não ☐

Se não, quais não possui?

Água ☐

Esgoto ☐

Lixo ☐

**4. Tem animais de estimação actualmente em casa?**

Não ☐

Sim ☐

Se sim, qual? Gatos ☐

Cães ☐

Outros ☐

Qual é o número destes animais no domicílio? \_\_\_\_\_.

Os animais têm acesso ao interior de sua residência?

Não ☐

Sim ☐

**5. Atualmente tem contacto, com frequência, com animais, que não os seus, em casa de parentes ou outras residências?**

Não ☐

Sim ☐

Se sim, quais? Gatos ☐

Cães ☐

Outros ☐

**6. Tem contacto com outros gatos que não sejam os seus?**

Não ☐

Sim ☐

Se sim com que frequência?

Muito frequente ☐

Pouco frequente ☐

Raramente ☐

**7. Caso tenha gatos de estimação, onde é que eles defecam?**

Dentro da casa ☐

Na proximidade da casa ☐

Distante da casa ☐

**8. Caso tenha gatos de estimação, qual é o seu principal alimento?**

Ração ☐

Restos de comida (cozinhada) ☐

Restos de carne crua ☐

**9. Sabe da existência de roedores no seu domicílio ou nas proximidades?**

Não ☐

Sim ☐

**10. Tem horta na sua residência?**

Não ☐

Sim ☐ Se sim esta é cercada, evitando a entrada de gatos?

Não ☐

Sim ☐

**11. Realiza atividades ligadas ao solo (jardinagem, agricultura, etc.)?**

Não ☐

Sim ☐

**12. Tem animais de criação para consumo próprio?**

Não ☐

Sim ☐ Se sim, quais?

Gado ☐

Porcos ☐

Aves ☐

☐

Outros

**12. Tem hábitos de consumir carne proveniente de animais abatidos em caça como pássaros, coelhos, javalis etc.**

Não ☐

Sim ☐

**13. Consome carne crua ou mal cozida?**

Não ☐

Sim ☐

Se sim, de que animais?

Gado ☐

Porco ☐

Ave ☐

Outros ☐

Se sim, com que frequência?

Muito frequente ☐

Pouco frequente ☐

Raramente ☐

**14. Consome leite ou laticínios não pasteurizados?**

Não ☐

Sim ☐

Se sim, com que frequência?

Muito frequente ☐

Pouco frequente ☐

Raramente ☐

**15. Lava frutas e verduras sempre antes de consumi-las?**

Não ☐

Sim ☐

Se sim, com que frequência?

Muito frequente ☐

Pouco frequente ☐

Raramente ☐

**16. Consome ovo cru ou mal cozido?**

Não ☐

Sim ☐

Se sim, com que frequência?

Muito frequente ☐

Pouco frequente ☐

Raramente ☐

**17. Consome água de poço/furo?**

Não ☐

Sim ☐

Se sim, com que frequência?

Muito frequente ☐

Pouco frequente ☐

Raramente ☐

**18. Recentemente fez alguma transfusão de sangue?**

Não ☐

Sim ☐

**19. Recentemente teve alguma picada/acidente de agulha/seringa?**

Não ☐

Sim ☐
